# Supplementary material for: TFG-β Nuclear Staining as a Potential Relapse Risk Factor in Early-Stage Non-Small-Cell Lung Cancer
Source: MDPI journal article supplement (doi:10.3390/ijms232213780), 2022-11-09
Supplement: s1 [file s1]

## SUPPLEMENTARY MATERIAL

### Supplementary Table

**Table S1.** Comparative study of patients with and without an analyzable sample

|                                                         | Sample           |                 |         |
|---------------------------------------------------------|------------------|-----------------|---------|
|                                                         | No<br>(n=39)     | Yes<br>(n=55)   | p-value |
| <b>Sex, n (%)</b>                                       |                  |                 | 0.111   |
| Male                                                    | 29 (74.4)        | 49 (89.1)       |         |
| Female                                                  | 10 (25.6)        | 6 (10.9)        |         |
| <b>Age, mean (SD)</b>                                   | 63.62<br>(10.13) | 63.93<br>(9.74) | 0.881   |
| <b>Histology, n (%)</b>                                 |                  |                 | 1.000   |
| squamous cell carcinoma                                 | 14 (42.4)        | 23 (42.6)       |         |
| non-squamous                                            | 19 (57.6)        | 31 (57.4)       |         |
| <b>Staging, n (%)</b>                                   |                  |                 | 0.350   |
| I                                                       | 19 (50.0)        | 33 (60.0)       |         |
| II                                                      | 15 (39.5)        | 14 (25.5)       |         |
| III                                                     | 4 (10.5)         | 8 (14.5)        |         |
| <b>Type of surgery, n (%)</b>                           |                  |                 | 0.937   |
| Limited resection<br>(segmentectomy or wedge resection) | 3 (7.7)          | 4 (7.3)         |         |
| Lobectomy                                               | 29 (74.4)        | 39 (70.9)       |         |
| Pneumonectomy                                           | 7 (17.9)         | 12 (21.8)       |         |
| <b>Chemotherapy, n (%)</b>                              |                  |                 | 0.230   |
| No                                                      | 17 (43.6)        | 33 (60.0)       |         |
| Adjuvant                                                | 17 (43.6)        | 15 (27.3)       |         |
| Neo Adjuvant                                            | 5 (12.8)         | 7 (12.7)        |         |

Categorical variables are represented by frequency and percentage. Age is represented by the mean and standard deviation (SD). The p-values were calculated using the t-Student test, chi-square test or Fisher's exact test, as appropriate.
